# Supplementary material for: Flavonoid Compounds Contained in Epimedii Herba Inhibit Tumor Progression by Suppressing STAT3 Activation in the Tumor Microenvironment
Source: PubMed Central journal article supplement (PMC7093601; doi:10.3389/fphar.2020.00262), 2020-03-18
Supplement: Image_1.pdf [file Image_1.pdf]

## Supplementary Material

### 1.1 Supplementary Figures

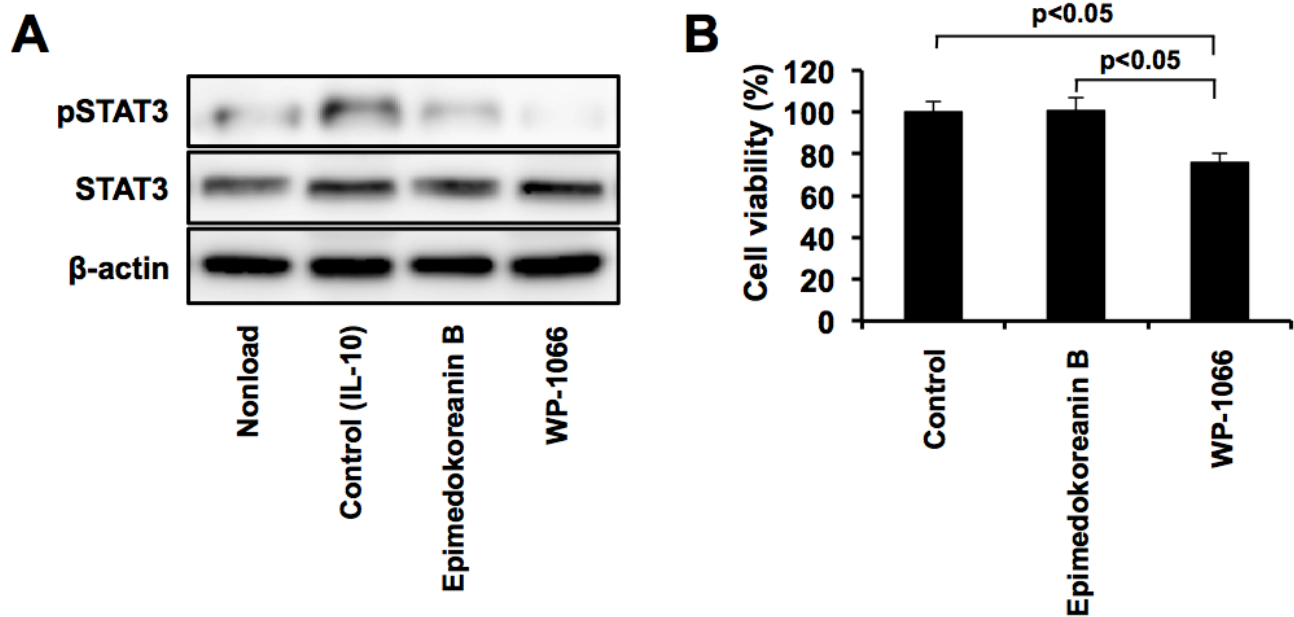

**Supplementary Figure. Effects of STAT3 inhibitor on STAT3 activation and cell viability in human macrophages.** Human monocyte-derived macrophages were incubated with WP1066 (5  $\mu$ M), a STAT3 inhibitor, and epimedokoreanin B (5  $\mu$ M) in the presence of IL-10 (20 nM) for 24 h, followed by determination of phosphorylated STAT3, STAT3, and  $\beta$ -actin expressions by western blot analysis (A). Human monocyte-derived macrophages were incubated with WP1066 (5  $\mu$ M), a STAT3 inhibitor, and epimedokoreanin B (5  $\mu$ M) for 24 h, followed by determination of cell viability using the WST-8 assay (B).
